1                    Speech motor behavior can be altered through reinforcement learning

2                                            Benjamin Parrell<sup>1,2,3</sup>

3                    <sup>1</sup> Department of Communication Sciences and Disorders, University of Wisconsin–Madison

4                                            <sup>2</sup> Waisman Center, University of Wisconsin–Madison

5                                            <sup>3</sup> Department of Linguistics and Cognitive Science, University of Delaware

6

7                    Corresponding author: Benjamin Parrell, [bparrell@wisc.edu](mailto:bparrell@wisc.edu)

8

9                    This work supported by a grant from the University of Delaware Research Foundation.

10

11                    The authors have no competing interests to declare.

12 **Abstract:**

13 Reinforcement learning, the ability to change motor behavior based on external reward, has been  
14 suggested to play a critical role in early stages of speech motor development and is widely used  
15 in clinical rehabilitation for speech motor disorders. However, no current evidence exists that  
16 demonstrates the capability of reinforcement to drive changes in human speech behavior. Speech  
17 provides a unique test of the universality of reinforcement learning across motor domains:  
18 speech is a complex, high-dimensional motor task whose goals do not specify a task to be  
19 performed in the environment but ultimately must be self-generated by each speaker such that  
20 they are understood by those around them. Reinforcement learning may thus be more difficult  
21 for speech, given its high-dimensional and redundant motor system, while speech may also be  
22 particularly responsive to reinforcement given the ultimate goal is typically reliant on such  
23 feedback from our interlocutors. Across four experiments, we establish whether reinforcement  
24 learning alone is sufficient to drive changes in speech behavior and parametrically test two  
25 features known to affect reinforcement learning in reaching: how informative the reinforcement  
26 signal is as well as the availability of sensory feedback about the outcomes of one's motor  
27 behavior. We show that reinforcement learning can alter speech behavior and that more  
28 informative reward signals lead to greater learning. Contrary to results from upper limb control,  
29 masking feedback about movement outcomes has no effect on speech learning. Our results  
30 suggest reinforcement learning is active in speech but may operate differently than in other  
31 motor domains.

## 32 **Introduction**

33 When we are speaking with someone, we are usually understood without any problems.  
34 However, sometimes this seemingly effortless communication breaks down, whether due to a  
35 noisy environment, problems in communication technology, a distracted listener, speaking with  
36 someone from another part of the country or world, or myriad other reasons. In these situations,  
37 we need to change our speech to be better understood, but we may have limited or no  
38 information about why we were not understood or how to change our speech to maximize  
39 intelligibility. In these cases, we may try out different pronunciations of a word until we receive  
40 positive feedback from the listener that they understood what we were saying. This type of trial-  
41 by-trial learning driven by external feedback is typically often referred to as *reinforcement*  
42 *learning* (sometimes, as model-free learning).

43 Reinforcement learning has been studied extensively in upper limb control (e.g.,  
44 Cashaback et al., 2017; Galea et al., 2015; Izawa & Shadmehr, 2011; Nikooyan & Ahmed, 2015;  
45 Therrien et al., 2016; Wu et al., 2014) and, to a smaller extent, in gait (Hasson et al., 2015). To  
46 date, it is essentially unknown to what extent reinforcement learning is active in speech  
47 production. Speech provides a unique test system to evaluate the universality of reinforcement  
48 learning across motor domains for two reasons. First, speech is a uniquely complex motor  
49 behavior, relying on coordination of close to roughly muscles between the respiratory,  
50 phonatory, and articulatory systems that requires complex control of both skeletal joints and the  
51 tongue, a muscular hydrostat. Second, speech is unique among human motor behaviors in that  
52 the targets for movements are internally generated rather than being defined in the environment.  
53 Ultimately, the goal in speech production is to be understood, and each speaker must come to  
54 define their own the motor task goals to accomplish this task.

55           Reinforcement learning in speech may be critical both during developmental speech  
56 acquisition and for treatment of motor disorders. Developmentally, reinforcement learning has  
57 been suggested to play a critical role in the first stages of speech acquisition (Howard &  
58 Messum, 2011, 2014; Messum & Howard, 2012; Warlaumont, 2014; Warlaumont et al., 2013;  
59 Warlaumont & Finnegan, 2016). In these models, the first words that infants produce are  
60 vocalizations produced with essentially random movements of the speech articulators. The  
61 productions that are recognized and positively reinforced by an external caregiver are more  
62 likely to be repeated. Over time, this reinforcement and repetition leads to consolidation of the  
63 motor plans that produce words that closely match the words in the language the infant is  
64 learning. In terms of motor rehabilitation, reinforcement also forms part of existing standards of  
65 care for motor speech disorders, typically combined with explicit instruction about how to  
66 produce a particular sound or set of sounds (Ballard et al., 2000; Duffy, 2013).

67           Despite the practical importance of reward learning in existing rehabilitation paradigms  
68 and its potential theoretical importance in human speech development, reinforcement learning in  
69 speech has received relatively little attention. The vast majority of studies on mechanisms of  
70 motor learning in speech has focused on sensory-error based learning (e.g., Daliri & Dittman,  
71 2019; Houde & Jordan, 1998; Lametti et al., 2012, 2018; MacDonald et al., 2011; Mitsuya et al.,  
72 2015; Purcell & Munhall, 2006; Shiller et al., 2009; Villacorta et al., 2007). In this type of  
73 learning, differences between predicted sensory feedback and perceived reafferent feedback  
74 about movement outcomes lead to sensory prediction errors, which are used to update internal  
75 models and/or control systems to adapt behavior to oppose the perturbation. While sensorimotor  
76 learning can also drive changes in speech behavior, these changes are relatively short-lived in  
77 both speech and other motor domains compared to the longer-term impact of reinforcement

78 learning (Krakauer, 2015; Roemmich & Bastian, 2018) and the two mechanisms rely on different  
79 neural substrates (Krakauer, 2015).

80         Perhaps because of its prominent role in speech rehabilitation, reinforcement learning has  
81 received some attention for clinical applications in speech. However, research to date, has almost  
82 universal focused on how the frequency of reinforcement affects learning, with mixed results  
83 (Adams et al., 2002; Adams & Page, 2000; Bislick et al., 2012, 2013; Hula et al., 2008; Katz et  
84 al., 2010; Steinhauer & Grayhack, 2000). While these studies have focused on the role of  
85 feedback frequency, they have not demonstrated clearly how reinforcement learning operates in  
86 speech. First, these studies mostly provided highly informative feedback about performance  
87 outcomes, giving participants either explicit instruction of *how* to improve their performance or  
88 highly informative feedback about their performance such as the difference between produced  
89 duration and a duration target (often referred to as “knowledge of performance” and “knowledge  
90 of results” (Schmidt & Lee, 2011)). In non-speech domains, this type of explicit information is  
91 known to aid learning during training but often decreases retention (Hasson et al., 2015; Schmidt  
92 & Lee, 2011). Second, these studies provided explicit instruction about the desired outcome.  
93 Although this is typical in clinical settings (Ballard et al., 2000), how explicit instruction  
94 interacts with other types of motor learning is unclear (Boyd & Winstein, 2004), and may in fact  
95 detrimentally affect learning in some cases (Green & Flowers, 1991; Shea et al., 2001).  
96 Critically, reinforcement learning in limb control is possible without explicit instruction (Galea  
97 et al., 2015; Izawa & Shadmehr, 2011; Nikooyan & Ahmed, 2015), suggesting it relies on a  
98 separate neural system.

99         The aim of the current study is to establish to what extent reinforcement learning is able  
100 to shape speech motor behavior. In addition to establishing the capability of the speech

101 sensorimotor system to learn purely from reinforcement signals, we additionally explore two  
102 aspects of reinforcement learning that may affect its effectiveness in speech. First, learning is  
103 more likely in reaching tasks when the reward signal contains some information about the  
104 desired outcome compared to uninformative signals that relay only success or failure,  
105 particularly for motor tasks involving multi-dimensional control (Kooij & Overvliet, 2016;  
106 Manley et al., 2014). Second, there is evidence that the availability of sensory feedback may  
107 interfere with reinforcement learning. Cashaback et al. (2017) designed a task where participants  
108 learned to alter their reach location either through reinforcement alone when visual feedback was  
109 withheld or through sensory errors driven by visual feedback. Critically, they used a non-uniform  
110 distribution of perturbations such that the two learning mechanisms differed in the magnitude of  
111 compensation. When both visual feedback and reinforcement were combined, pitting the two  
112 learning systems against each other, learning was identical to the visual feedback alone. This  
113 result suggests the availability of sensory feedback may interfere with reinforcement learning in  
114 some cases.

115 We parametrically explore these two factors (information content of the reward signal  
116 and availability of sensory feedback) in a set of four studies on speech reinforcement learning  
117 where the factors are crossed in a 2 x 2 design. The basic goal, across all experiments, is to  
118 induce a change in the first vowel formant (F1) of the vowel / $\epsilon$ / (as in *head*). Vowel formants are  
119 the characteristic resonances of the vocal tract, are closely tied to movements within of the lips,  
120 tongue, and jaw, and are typically used to characterize vowels in speech. Notably, a similar  
121 change in vowel formants is frequently the target of sensorimotor learning studies in speech.  
122 Thus, this paradigm will allow for comparison of our results with previous work in this area. To  
123 establish the ability of reinforcement learning to drive changes in speech behavior, we examine

124 change in F1 in each study separately. To examine the effect of reward signal information  
125 content and sensory feedback availability, we compare results across all four studies.

126

## 127 **Methods**

### 128 *Participants:*

129 All participants were recruited from courses in the Linguistics and Cognitive Sciences  
130 department at the University of Delaware and were compensated with extra credit in those  
131 courses. No participant reported any history of speech or hearing problems. Experiments 1, and  
132 2, and 4 had 20 participants each (Exp 1: 19 female/1 male; Exp 2: 20 female/0 male; Exp 4: 14  
133 female/6 male). Experiment 3 had 21 participants (16 female/5 male). The experimental protocol  
134 was approved by Institutional Review Boards at the University of Delaware and the University  
135 of Wisconsin–Madison.

136

### 137 *General methods:*

138 The experiments are designed to induce participants to alter the first vowel formant (F1) in the  
139 vowel /ε/ solely through external reinforcement. Participants wore a head-mounted microphone  
140 (AKG C520) that was used to record their speech, and wore closed-back, over-the-ear  
141 headphones (Beyerdynamic DT 770) that were used to play auditory reward signals and, in  
142 Experiments 3 and 4, to play speech-shaped noise designed to mask auditory feedback. Audio  
143 data was digitized using a Scarlett 2i2 USB audio interface and recorded with the Audapter  
144 program (Cai et al., 2008; Tourville et al., 2013) in MATLAB.

145 Each experiment has three phases: baseline, training, and washout (Figure 1, example for  
146 “head” shown). During all phases, participants read words out loud, one at a time, as they appear

147 on a computer screen. Stimuli for the baseline, training, and washout phases were *head*, *bed*, and  
148 *dead* for all experiments. These stimuli contained the target vowel / $\epsilon$ /. Experiments 2, 3, and 4  
149 additionally included the words *hid*, *bid*, *did* and *had*, *bad*, *dad* during the baseline phase only to  
150 measure F1 for the vowels / $i$ / and / $\ae$ /, respectively. The order of the stimuli was randomized for  
151 each participant. Each word with / $\epsilon$ / was repeated at least 20 times during the baseline phase of  
152 each experiment.

153 In order to provide real-time feedback based on participants' vowel formants, the target  
154 vowel for each trial was detected automatically as the part of the speech signal for that trial  
155 above a participant-specific amplitude threshold. Then, vowel formants were tracked using Praat  
156 (Boersma & Weenink, 2019). A single F1 value for that trial was then calculated as the average  
157 F1 within a 50ms window centered around the vowel midpoint. Using a small window ensured  
158 the F1 measurement was taken from the steady-state portion of the vowel even with a somewhat  
159 noisy estimate of vowel onset and offset. The participant-specific amplitude threshold used for  
160 vowel detection and Linear Predictive Coefficient order for formant tracking were set in a brief  
161 parameter setting session immediately prior to the main experiment.



162

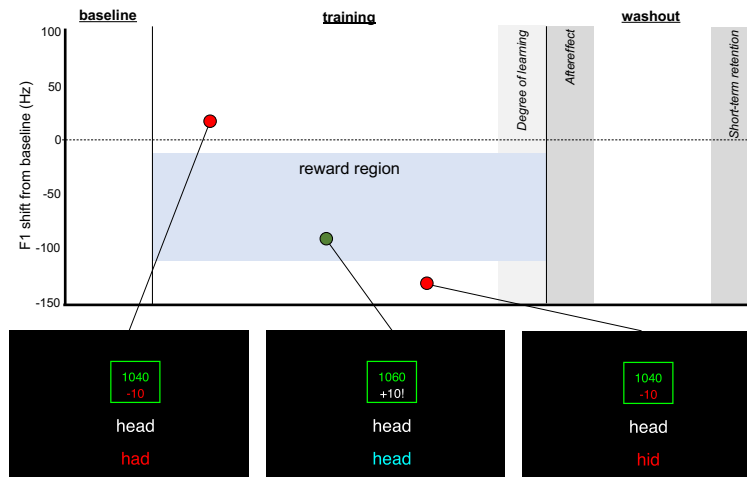

Figure 1: Schematic of general methods. Examples of trials with F1 above (left), in (center), and below (right) the target region are shown.

- 163 • Baseline phase (80-120 trials): Participants are told that they are training a computer  
164 program to recognize their particular voice. During this phase, the mean and standard  
165 deviation of F1 is measured. No reward or reinforcement signal was given during the  
166 baseline phase.
- 167 • Training phase (250-350 trials): Participants are told the computer program that was just  
168 trained will try to recognize the words they speak. Participants gain points when the computer  
169 recognizes the target word (+ in Fig 1) and lose points when it recognizes another word (x  
170 Figure 1). Rewards are presented visually and accompanied by auditory reward signals  
171 (chimes, spoken words) which vary by experiment. Participants are told that their goal is to  
172 gain points by being recognized correctly by the computer. Unknown to the participants, the  
173 computer recognizes words as correct only when the first vowel formant (F1) falls within a  
174 specific target region (blue shaded region in Fig 1). This target region is 100 Hz wide, and is  
175 defined relative to the participant's mean F1 for the vowel /ε/ produced during the baseline  
176 phase (10-110 Hz below the mean). The overlap of the reward region with participants baseline

177 productions was chosen to ensure that participants would receive positive reward on some  
178 productions without changing their baseline behavior, as large shifts that do not overlap with  
179 baseline production may be difficult to learn (Therrien et al., 2016). A positive reward (+10  
180 points) was given if F1 falls within a target region defined relative to the participant's mean  
181 F1 in the baseline phase (10-110 Hz below the mean). Productions above this region are  
182 recognized as containing the vowel /æ/ (e.g., *had*); those below this region, the vowel /ɪ/ (e.g.,  
183 *hid*). The direction of the target region shift relative to baseline values (positive or negative)  
184 was always negative; thus, participants needed to shift their production of /ε/ towards /ɪ/ to  
185 produce F1 in the target region. Participants started with 1000 points.

186 • Washout phase (100-150 trials): Participants are told that the game is over, and that they are to  
187 simply read the words as they appear. Participants do not receive any feedback or earn/lose  
188 points during the washout phase. The long washout period (100-150 trials, depending on the  
189 experiment) allows for testing short-term retention of learning. Notably, changes in speech  
190 behavior due to sensorimotor learning return to near baseline values within 30-50 trials  
191 (MacDonald et al., 2011; Parrell et al., 2017). The washout phase is used to assess both the  
192 degree of learning (*aftereffects*, measured during first 20 trials) and short-term retention (last  
193 20 trials). No reward or reinforcement signal was given during the washout phase.

194  
195 Each trial lasted 3 seconds. Feedback about performance, if shown, was displayed for an  
196 additional 2 seconds. There was a 0.5 second pause between each trial when no stimulus word  
197 was displayed.

198

199 Experiment-specific methods:

200 *Experiment 1:* The baseline phase consisted of 80 trials; the training phase, 350 trials; and the  
201 washout phase, 100 trials. During the training phase, when participants production fell within the  
202 reward region, a pleasant chime was played over the headphones. When the production fell  
203 above or below this region, a pre-recorded voice saying the “recognized” word was played. For  
204 example, when the stimulus was “head”, “had” was played when the production was above the  
205 target region, while “hid” was played when the production fell below the target region.

206

207 *Experiment 2:* The baseline phase consisted of 120 trials; the training phase, 250 trials; and the  
208 washout phase, 150 trials. All acoustic reinforcement signals were based on each participants’  
209 own productions recorded during the baseline phase. For each word in the baseline phase, the  
210 production with median F1 was chosen to be played back to the participant during the training  
211 phase. In order to create a positive reinforcement signal that fell within the target region, F1 for  
212 the chosen productions of *head*, *bead*, and *dead* was shifted by -60 Hz using Audapter. This  
213 resulted in an F1 in the center of the reward zone for these words. During the training, when the  
214 production fell above or below the target region, the participant’s recording of the “heard” word  
215 was played. For example, when the stimulus was “head”, “had” was played when the production  
216 was above the target region, while “hid” was played when the production fell below the reward  
217 zone. When the production fell within the reward zone, the modified version of the “heard” word  
218 was played. For example, when the stimulus was “head”, the participant’s own production of  
219 “head” from the baseline phase, with F1 shifted by -60 Hz, was played.

220

221 *Experiments 3 and 4:* Experiments 3 and 4 were designed to mirror the reinforcement signals  
222 used in Experiments 1 and 2 with the addition of speech-shaped noise designed to mask

223 participants' ability to hear their own speech. For Experiment 3, the baseline phase consisted of  
 224 120 trials; the training phase, 250 trials; and the washout phase, 150 trials. For Experiment 4, the  
 225 baseline phase consisted of 90 trials; the training phase, 250 trials; and the washout phase, 100  
 226 trials. Stimuli with all vowels (/ɪ/, /ɛ/, and /æ/) were included in the baseline phase, where each  
 227 stimulus word was repeated 10 times each. For both experiments, only the /ɛ/ stimuli were used  
 228 after the baseline phase. Reinforcement signals were the same as those used in Experiment 1  
 229 (Experiment 3) and Experiment 2 (Experiment 4). The amplitude of the masking noise was  
 230 modulated by the amplitude of the participant's speech using Audapter, with the noise played at  
 231 a constant gain above the speech amplitude and calibrated to be roughly 80 dB when speaking at  
 232 a normal volume (Figure 2). This allowed us to prevent participants from receiving auditory  
 233 feedback about their speech, while largely avoiding potential Lombard affects associated with  
 234 speaking in the presence of background noise. A summary of differences between experiments is  
 235 shown in Table 1.

236

237 *Table 1: Methodological differences between experiments.*

| EXP   | POSITIVE<br>REWARD SOUND                                         | MASKING<br>NOISE | VOWELS IN<br>BASELINE | BASELINE<br>TRIALS | TRAINING<br>TRIALS | WASHOUT<br>TRIALS |
|-------|------------------------------------------------------------------|------------------|-----------------------|--------------------|--------------------|-------------------|
| EXP 1 | chime                                                            | no               | /ɛ/                   | 80                 | 350                | 100               |
| EXP 2 | resynthesized token<br>from baseline with<br>F1 in target region | no               | /ɛ/, /æ/, and /ɪ/     | 120                | 250                | 150               |
| EXP 3 | chime                                                            | yes              | /ɛ/, /æ/, and /ɪ/     | 120                | 250                | 150               |
| EXP 4 | resynthesized token<br>from baseline with<br>F1 in target region | yes              | /ɛ/, /æ/, and /ɪ/     | 90                 | 250                | 100               |

238

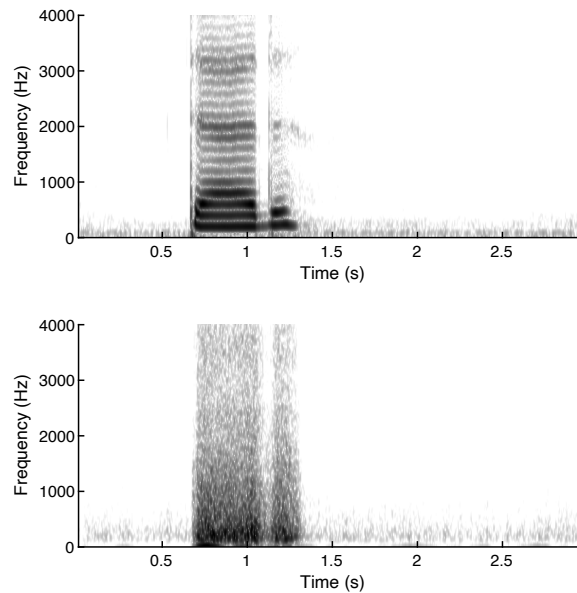

*Figure 2: Spectrograms showing speech input (top) and amplitude-modulated masking noise (bottom) used in experiments 3 and 4. The amplitude-modulated noise served to mask auditory feedback while limiting Lombard effects associated with speaking in noise.*

239

240

241 Post-participation survey:

242 Participants in Exp 2 and 3 were given a survey after they completed the experiment to assess  
243 whether they adopted any strategy and, if so, what that strategy was. Participants were also asked  
244 a set of questions regarding their level of engagement and attention during the experiment.

245

246 Data analysis:

247 The primary outcome for all experiments was the change in F1 for /ε/ from its baseline value.  
248 For each participant, all trials for a given participant were normalized to the mean F1 for words  
249 with /ε/ from the baseline phase. To measure learning, we took the mean of this normalized F1  
250 over the last 20 trials of the training phase. Aftereffects were measured as the mean F1 during the

251 first 20 trials of the washout phase, and short-term retention was measured as the mean during  
252 the last 20 trials of the washout phase. In order to test whether learning occurs, we used linear  
253 mixed-effects models using the *lme4* package (Bates et al., 2014) in *R* (R Core Team, 2013) with  
254 a fixed factor of phase (baseline, end of training, aftereffects, short-term retention) and random  
255 intercepts for participants (there were not enough observations to fit random slopes). Statistical  
256 significance was evaluated with the *lmerTest* package (Kuznetsova et al., 2017). Separate tests  
257 were conducted for each experiment. Post-hoc comparisons were conducted using the *emmeans*  
258 package (Lenth et al., 2020) with corrections for multiple comparisons.

259         On visual inspection of the data, it became clear that learning was not uniform—some  
260 participants clearly showed a change speech behavior that moved their F1 to the target region,  
261 while others showed no change (Figure 3A). To quantify these differences, we sorted  
262 participants into “learners” and “nonlearners” based on their behavior in the last 50 trials of the  
263 training phase. Participants whose F1 in these trials was significantly lower than baseline  
264 (towards the target), as assessed through a t-test with  $\alpha = 0.05$ , were classified as learners. All  
265 other participants were classified as non-learners. Classifying participants based on a metric of  
266 task success—i.e., participants who produced a significantly greater number of rewarded trials  
267 than would be expected given the standard deviation of their baseline production of words with  
268 /ε/—resulted in essentially the same classification pattern. Each method classified 2 participants  
269 as learners that were classified as non-learners by the other method. Pooling across all  
270 experiments, the distribution of learning is highly non-normal (Kolmogorov-Smirnov test:  $D(81)$   
271  $= 0.67, p = 3 \times 10^{-32}$ , Figure 3B). The figure shows learning as the change in F1 from baseline to  
272 the end of the training phase, expressed as a z-score based on baseline variability. When fitting  
273 the data with two Gaussian distributions, the two distributions have centers at -2.04 and -0.15,

274 consistent with a group of learners who lowered their F1 and a group of non-learners who did  
275 not. We report the number of learners for each experiment and descriptive statistics for learners  
276 and non-learners. However, no inferential statistics are reported for either group since the  
277 division was done a posteriori based on the data.

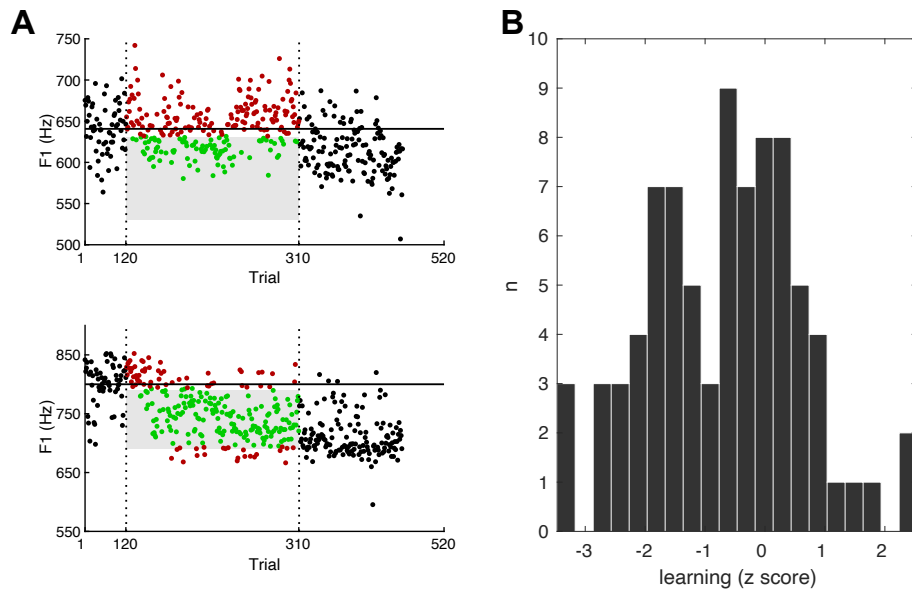

Figure 3: **A:** Two example participants from experiment 3. The target region for receiving reward is shown in grey. Productions in the baseline and washout phases are shown as black circles. Productions during the training phase are shown as green circles if participants received a positive reward and as red circles if participants received a negative reward. The participant in the top panel shows no change in F1 frequency over the course of the experiment, while the participant in the bottom panel shows a clear shift in F1 frequency to the rewarded region that is maintained during washout. **B:** Distribution of learning for all participants across all four experiments. Learning shown as z-scored change in F1 from baseline values. The distribution is non-normal and has two peaks near -2 and 0.

278

279

280 In addition to the individual experiment analyses, we conducted a series of meta-analyses

281 across experiments. These analyses allowed us to test directly whether the different

282 manipulations across experiments—the type of reward signal on positively rewarded trials and

283 the presence of masking noise—affected the degree of learning. For these analyses, we

284 conducted ANOVAs with reward signal and masking noise as fixed factors. Separate analyses

285 were conducted for the training, aftereffects, and short-term retention measures of learning. We  
286 conducted separate analyses on both the full dataset as well as a dataset limited to only  
287 participants classified as learners. This second analysis allows us to determine whether potential  
288 differences between experiments are due to different degrees of learning or, conversely, to  
289 differences in the fraction of participants who learn without any difference in the magnitude of  
290 the change in participants who do learn. To further probe whether the proportion of learners  
291 varies across experiments, we conducted Chi-squared tests comparing the proportion of learners  
292 1) across all experiments, 2) across experiments without masking noise (Exp 1 and 2) and with  
293 masking noise (Exp 3 and 4), and 3) across experiments with no implicit imitation target (Exp 1  
294 and 3) and with an implicit imitation target (Exp 2 and 4).

295         A second goal of the meta-analysis was to further probe the potential mechanisms driving  
296 reward learning in speech. For this, we measured another set of speech parameters related to  
297 either overall variability or trial-to-trial corrections, both of which have been suggested to be  
298 related to reward in other motor domains (Dhawale et al., 2017; Wong & Shelhamer, 2011). We  
299 measured F1 variability during the baseline phase (taken only from words with / $\epsilon$ /), to test  
300 whether participants who are naturally more variable may learn better. Variability was measured  
301 in two ways: as the standard deviation of all / $\epsilon$ / productions in the baseline phase as well as the  
302 average trial-to-trial change in these trials. We additionally measured the change in F1 standard  
303 deviation during the first 30 training trials (early learning) compared to baseline variability to  
304 assess whether learning is associated with increased exploration of the potential solution space.  
305 We also measured the F1 distance from / $\epsilon$ / to / $i$ / during the baseline phase (Exp 2-4 only), as  
306 participants who have a larger space between these vowels may be able to lower F1 for / $\epsilon$ /  
307 without encroaching on / $i$ /. Lastly, we measured the average magnitude of the trial-to-trial



308 change in F1 after trials with positive and negative reward. This allows us to assess how much  
309 participants change their production after a negative reward (“exploration”) and whether  
310 participants maintain similar F1 values after positive reward (“exploitation”). Statistical tests  
311 were conducted by correlating these measures with the magnitude of learning at the end of the  
312 hold phase across participants. Results were very similar using either aftereffects or short-term  
313 retention measures.

314

## 315 **Results**

316 All experiments had the same structure (Figure 1). In all phases, participants spoke one  
317 word per trial our loud (*head*, *bed*, or *dead*, all containing the same / $\epsilon$ /vowel). First, participants  
318 completed a baseline phase to measure a participant-specific mean F1 values for the vowel / $\epsilon$ /.  
319 No reinforcement was given during this phase. Participants were told this phase was being used  
320 to train the computer to recognize their speech. The baseline phase was followed by a training  
321 phase where participants were instructed that the computer would attempt to recognize the word  
322 they spoke, and were instructed to try to get the computer to recognize them correctly. In the  
323 training phase, the computer recognized the “correct” word if participants produced the vowel / $\epsilon$ /  
324 with an F1 value 10-110 Hz below their baseline mean. Positive reward was given by earning  
325 points (+10), visual feedback of the correctly recognized word, and an auditory reward. In  
326 experiments 1 and 3, auditory reward was a pleasant chime. In experiments 2 and 4, auditory  
327 reward was a token of each participant’s own speech from the baseline phase with F1 for the  
328 vowel / $\epsilon$ / shifted by -60 Hz to the middle of the reward region. Negative reward was given by  
329 losing points (-10), visual feedback of the incorrectly recognized word, and the an audio  
330 recording of the incorrectly recognized word. Learning was measured as the change in F1 from

331 baseline at the end (last 20 trials) of the training phase. Following training, participants competed  
332 a washout where no reward was given. The washout phase was used to examine immediate  
333 aftereffects of learning (first 20 trials) as well as short-term retention of learning (trials 80-100).  
334 Experiments 1 and 2 had no masking noise. In Experiments 3 and 4, speech-shaped noise was  
335 played over headphones to mask participants' ability to hear their own speech. Results for each  
336 experiment are first presented individually. All descriptive statistics show mean and standard  
337 error. Data for all experiments is shown in Figure 4.

338

#### 339 Experiment 1:

340 Experiment 1 had no masking noise and used a chime as auditory feedback for positive reward.  
341 At the group level, participants showed a very slight change in F1 values towards the target  
342 region by the end of the training phase ( $-2.7 \pm 5.8$  Hz), which persisted into the aftereffects ( $-$   
343  $3.5 \pm 6.2$  Hz) and retention ( $-5.9 \pm 7.4$  Hz) measures. However, this change was not significant  
344 ( $F(3,57) = 0.37, p = 0.78$ ). Despite the lack of an overall effect, 6/20 participants showed  
345 significant learning at an individual level, producing a change in their F1 relative to baseline  
346 values by  $-30.0 \pm 4.4$  Hz at the end of training. This change persisted into both the aftereffects ( $-$   
347  $29.1 \pm 9.1$  Hz) and retention ( $-39.9 \pm 9.8$  Hz) phases.

348

#### 349 Experiment 2:

350 Experiment 2 had no masking noise and used a resynthesized token of each participant's own  
351 speech, with F1 shifted to the middle of the target region as auditory feedback for positive  
352 reward. Participants produced a significant change from baseline after training ( $F(3,57) = 6.4, p$   
353  $< 0.001$ ). Across all participants, F1 was lower than baseline ( $p < 0.001$ ) at the end of the

354 training phase ( $-29.9 \pm 5.8$  Hz), in the aftereffects ( $-23.6 \pm 6.1$  Hz), and in retention ( $-23.8 \pm 6.8$   
355 Hz). These phases did not differ from each other (all  $p > 0.97$ ). At the individual level, 17/20  
356 participants exhibited significant learning. When considering only these participants, learning  
357 was greater than for the whole group (training:  $-37.9 \pm 4.4$  Hz; aftereffects:  $-30.4 \pm 5.8$  Hz;  
358 retention:  $-30.0 \pm 6.8$  Hz).

359

### 360 Experiment 3:

361 Experiment 3 had masking noise that blocked participants' perception of their own speech and  
362 used a chime as auditory feedback for positive reward. Participants did change their F1 from  
363 baseline, as reflected by a main effect of phase in the statistical model ( $F(3,60) = 3.5, p = 0.02$ ).  
364 F1 was lower than baseline in all phases (training:  $-7.1 \pm 8.6$  Hz; aftereffects:  $-11.7 \pm 8.5$  Hz;  
365 retention:  $-23.3 \pm 8.3$  Hz). However, only the retention phase was significantly different from  
366 baseline ( $p = 0.01$ , other  $p > 0.41$ ). The retention phase was not significantly different from  
367 either the training ( $p = 0.14$ ) or aftereffects measures ( $p = 0.41$ ). 9/20 participants exhibited  
368 significant learning, producing much larger changes in F1 than the group overall (training:  $-42.6$   
369  $\pm 8.4$  Hz; aftereffects:  $-34.0 \pm 10.8$  Hz; retention:  $-42.1 \pm 15.6$  Hz).

370

### 371 Experiment 4:

372 Experiment 1 had masking noise that blocked participants' perception of their own speech and  
373 used a resynthesized token of each participant's own speech, with F1 shifted to the middle of the  
374 target region as auditory feedback for positive reward. Across all participants, F1 was reduced,  
375 relative to baseline, in the training ( $-22.9 \pm 6.0$  Hz), aftereffects ( $-21.4 \pm 6.5$  Hz), and retention ( $-$   
376  $24.2 \pm 8.6$  Hz) measures. These values were significantly lower than baseline ( $F(3,57) = 12.4, p$

377 < 0.0001, all individual measures  $p < 0.001$ ). There were no differences between the three  
378 phases (all  $p > 0.63$ ). 14/20 participants showed learning at an individual level (training:  $-26.2 \pm$   
379  $5.2$  Hz; aftereffects:  $-34.0 \pm 10.8$  Hz; retention:  $-42.1 \pm 15.6$  Hz).

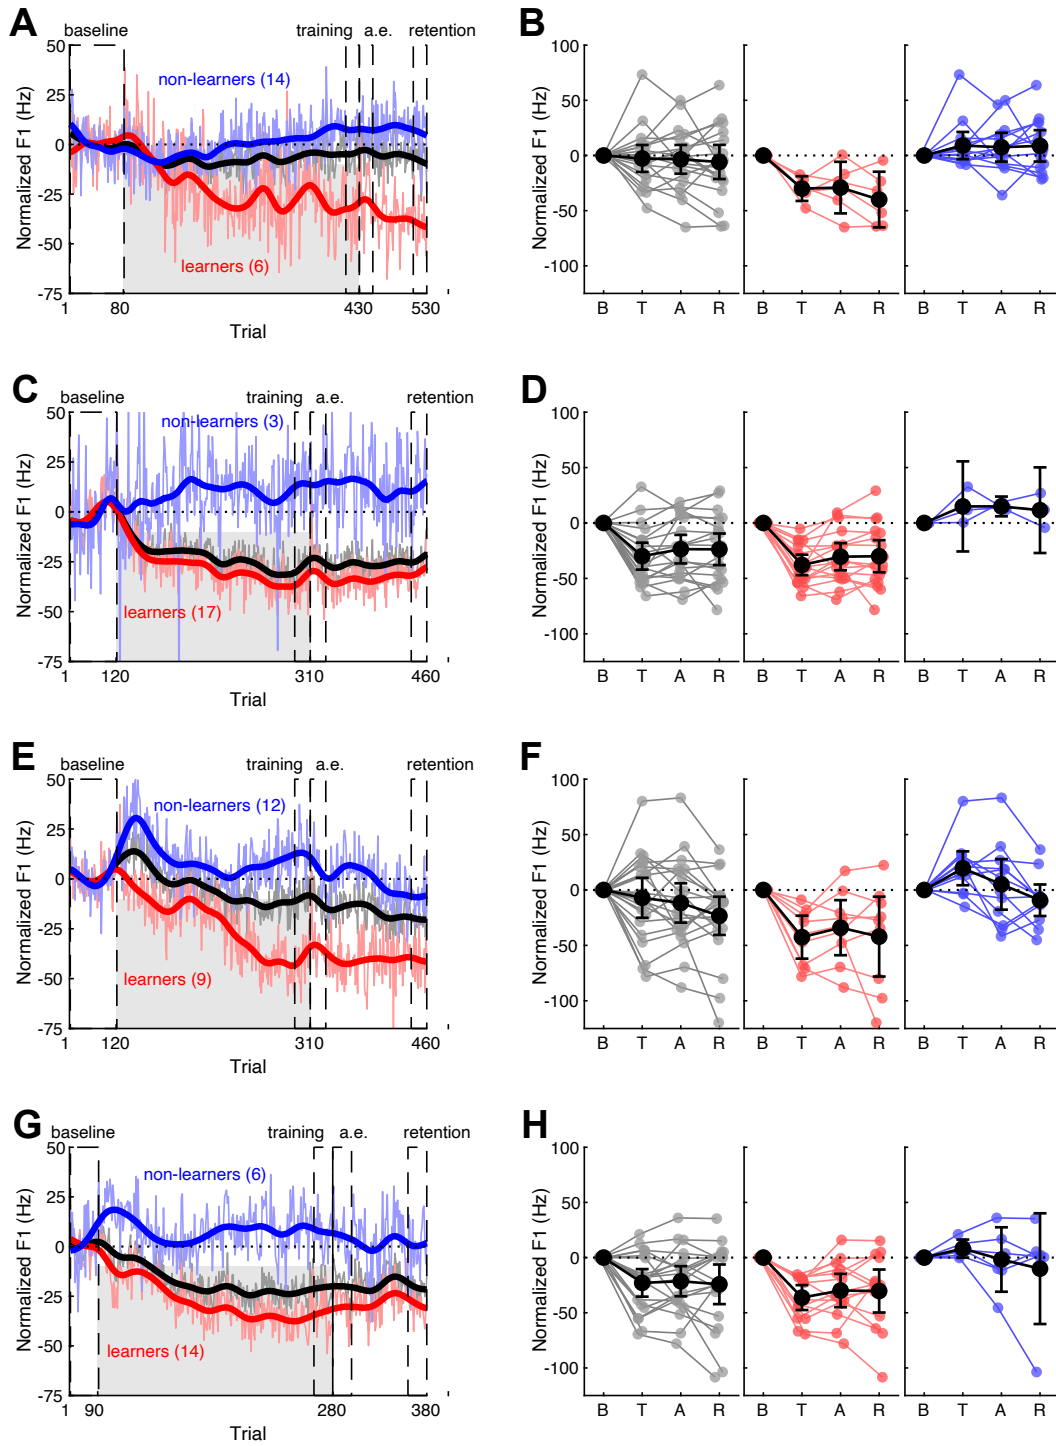

380

Figure 4: Change in F1 for all experiments. Experiments 1-4 are shown in order from the top down. **A, C, E, G**: mean F1 value over the course of the experiment for all participants (black), learners (red) and non-learners (blue). Raw trial averages (thin lines) as well as a smoothed running average over 10 trials (thick lines) are shown. **B, D, F, H**: F1 values in the baseline (B), end of training (T), aftereffects (A), and short-term retention (R) phases for experiments 1 (B), 2, (D), 3, (F), and 4 (H). From right to left, data is shown for all participants(back), learners (red), and non-learners (blue).

381 Differences between experiments:

382 All the presented meta-analyses comparing results from different experiments measured learning  
383 as the change in F1 from baseline to the end of the training phase. Analyses using the aftereffects  
384 produced essentially the same results. Analyses using retention showed no differences between  
385 experiments based on either the presence of masking noise or the type of auditory reward signal.  
386 In terms of overall change in F1, there was a significant effect of positive reward signal ( $F(1,77)$   
387  $= 10.2, p < 0.01$ ), such that the change was greater in Experiments 2 and 4, where the reward  
388 signal was a token of each participant's own speech with a shifted F1 value, than in Experiments  
389 1 and 3, where the reward signal was a chime. Contrary to our initial hypothesis, masking noise  
390 had no effect on F1 change ( $F(1,77) = 0.04, p = 0.85$ ), nor was there any interaction between the  
391 presence of masking noise and the reward signal ( $F(1,77) = 0.7, p < 0.40$ ).

392 However, the effect of reward signal was not significant when examining only  
393 participants classified as learners ( $F(1,42) = 0.004, p = 0.95$ ). Neither masking, nor the  
394 interaction between masking and reward signal were significant in this group (both  $p > 0.25$ ).  
395 This result suggests that the difference in the magnitude of F1 change between experiments with  
396 different reward signals was likely driven by differences in the proportion of learners, rather than  
397 in the degree to which participants changed F1 if they did learn. A set of chi-squared tests on the  
398 proportion of learners in each experiment supports this idea. There was an overall difference in  
399 the proportion of learners between all experiments ( $\chi^2(3, N = 81) = 14.5, p = 0.001$ ). This was  
400 largely driven by a difference between experiments with different reward signals ( $\chi^2(3, N = 81)$   
401  $= 12.2, p < 0.001$ ). There was no difference in the proportion of learners based on masking noise  
402 ( $\chi^2(3, N = 81) = 1.0, p = 0.32$ ).

403 Across experiments, the magnitude of F1 change at the end of the training phase was not

404 well predicted by variability. Neither baseline variability, change in variability from the baseline  
405 to the training phase, nor distance between /ε/ and /ɪ/ in the baseline phase predicted learning  
406 (Table 2). The exceptions are the amount of F1 change after receiving positive and negative  
407 reinforcement during the training phase. The best predictor of learning was the trial-to-trial  
408 change in F1 after receiving positive reward. Participants who produced smaller changes in these  
409 trials learned more ( $R^2 = 0.26$ ,  $p < 0.0001$ ). Additionally, increased learning was associated with  
410 participants who produced larger trial-to-trial F1 changes after receiving negative reward, though  
411 the magnitude of this effect was relatively modest ( $R^2 = 0.05$ ,  $p = 0.03$ ). Results for all factors  
412 are shown in Figure 5.

413         Based on the significant relationship between change after positive reward and learning,  
414 we considered whether the difference in overall learning magnitude (driven by the proportion of  
415 learners) between experiments with informative and non-informative reward signals could be  
416 related to differences in the degree to which participants shifted their productions after positive  
417 reward. For example, participants may be less likely to shift their production after they hear a  
418 word with the “correct” F1. However, we found no evidence that the magnitude of shift after  
419 positive reward differed between studies with different reward signals ( $F(1,77) = 2.4$ ,  $p = 0.13$ )  
420 or based on the presence of masking noise ( $F(1,77) = 0.3$ ,  $p = 0.59$ ). There was similarly no  
421 significant interaction between the two factors ( $F(1,77) = 0.003$ ,  $p = 0.96$ ).

422         We additionally examined whether variability in the baseline phase or early in the  
423 training phase affected the percentage of trials that were produced with F1 in the target region.  
424 Recall that the target region ranged from 10 to 110 Hz below each participant’s baseline mean.  
425 This was chosen to ensure that all participants received reward on some trials without needing to  
426 change their baseline F1 values. Indeed, baseline variability, as measured by the standard

427 deviation of F1, ranged from 13-56 Hz. Variability in the first 50 trials of the training phase  
428 ranged from 12-127 Hz. Even at the small end of this range, we would expect participants to  
429 receive positive reward on at least 20% of trials. In our data, all participants received at least  
430 some positive reward for trials with F1 within the target region during the training phase, as  
431 expected (1.2%-94.4% of trials, across participants). There was a small but significant  
432 relationship between baseline variability and percentage of trials produced with F1 in the target  
433 region across the training phase ( $R^2 = 0.03$ ,  $p = 0.04$ ). However, there was no relationship  
434 between variability in the training phase itself and percentage of trials with F1 in the target  
435 region ( $R^2 = 0.002$ ,  $p = 0.028$ ). Together, these results suggest little relationship between  
436 variability and percentage of rewarded trials.

437

438 *Table 2: Correlations between the change in F1 from the baseline to the end of the hold phase and various potential predictors of*  
439 *learning*

| <b>MEASURE</b>                                          | <b><math>R^2</math></b> | <b><math>P</math></b> |
|---------------------------------------------------------|-------------------------|-----------------------|
| Baseline standard deviation                             | 0.01                    | 0.16                  |
| Baseline trial-to-trial change                          | -0.01                   | 0.56                  |
| Increase in standard error from<br>baseline to training | -0.01                   | 0.78                  |
| /ε/ - /ɪ/ distance                                      | -0.02                   | 0.78                  |
| F1 change after negative reward                         | 0.05                    | 0.02*                 |
| F1 change after positive reward                         | 0.28                    | < 0.0001*             |



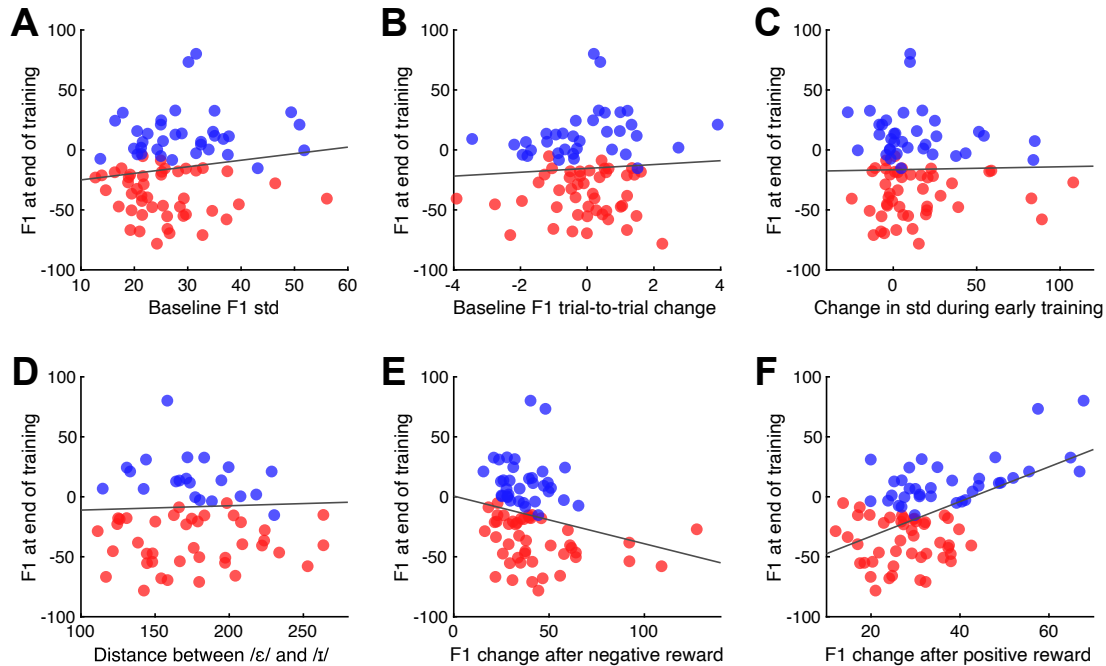

Figure 5: Potential factors associated with learning, defined as the magnitude of F1 change from baseline at the end of the training phase. In all panels, learners are shown in red and non-learners in blue. A solid black line indicated the regression model. **A**: Baseline standard deviation of F1. **B**: trial-to-trial change in F1 in the baseline phase. **C**: change in standard deviation of F1 from the baseline phase to the training phase. **D**: F1 distance between / $\epsilon$ / and / $\iota$ / in the training phase. **E**: trial-to-trial change in F1 after receiving negative reward in the training phase. **F**: trial-to-trial change in F1 after receiving positive reward in the training phase.

440 Strategy use and engagement:

441 Strategy use was assessed in a follow-up survey after experiments 2 and 3. Participants were  
442 asked the question “Did you develop any techniques or strategies during the task? If so, what  
443 was that strategy?”. In Experiment 2, 16/20 participants reported using a strategy. Only 4 of  
444 these strategies related to changing the quality of the vowel, which was required to perform the  
445 task successfully. Despite the presence of a highly informative auditory reward signal for  
446 positive reward (a token of the participants’ own speech with F1 shifted to the middle of the  
447 target region), only 2/20 participants reported imitating the reward signal (both of these  
448 participants were classified as learners. In Experiment 3, 19/21 participants reported using a  
449 strategy. Of these, only 2 were plausibly related to changing vowel quality. Positive reward was  
450 accompanied by a chime in this experiment, so participants could not imitate the reward signal.

451 Individual participant responses are reported in the Appendix.

452 Participants in these studies were also asked to rate how engaging they found the task.  
453 Specifically, they were asked to rate their agreement with the statements “I was motivated to  
454 perform well in this task” and “I was motivated by the points I was earning” on a scale from 0  
455 (disagree) to 100 (agree). The median overall motivation was 95 (mean: 84.5, 9 participants  
456 reported “yes” instead of reporting a number). The median motivation related to the points was  
457 100 (mean: 83.5, 8 participants reported “yes” and 1 participant reported “no” instead of  
458 reporting a number).

459

## 460 **Discussion**

461 In a set of four experiments, we examined whether positive and negative reinforcement alone  
462 could cause participants to change their speech production in the absence of any explicit  
463 instruction. Specifically, we examined whether participants could learn to lower the first formant  
464 of the vowel /ε/, analogous to a widely-demonstrated change that can be induced through  
465 sensorimotor adaptation. We tested two additional aspect of reinforcement learning. First, we  
466 examined the effects of the auditory signal given for positive reward, comparing an arbitrary  
467 sound (a chime) with a potentially-informative sound (a resynthesized version of each  
468 participant’s own speech, with F1 shifted to the center of the target region). We hypothesized  
469 that the more informative reward signal would lead to a larger magnitude of learning. Second,  
470 we examined the effect of masking auditory feedback of participants’ speech would affect  
471 learning. Based on previous work in reaching showing that visual feedback of hand position  
472 reduces the effectiveness of reinforcement learning to change reach angle, we hypothesized that  
473 learning would be reduced when auditory feedback was available, as shifting F1 in this case

474 would conflict with participants internal targets for speech.

475           Our results showed that reinforcement can indeed drive participants to learn to shift their  
476 vowel production even in the absence of any explicit instruction. While we observed learning in  
477 some participants in all experiments, the average magnitude of learning was greater in  
478 experiments with informative reward signals. This increase in average learning, however, was  
479 driven by a greater proportion of participants who were able to learn to shift their F1 towards the  
480 target region. When examining only participants who exhibited learning, the magnitude of  
481 learning was similar across studies. Thus, it seems that an informative reinforcement signal  
482 makes learning more likely, but does not affect the magnitude of learning.

483           Perhaps surprisingly, this effect does not seem to be driven by explicit imitation of the  
484 informative reinforcement signal. In Experiment 2, 17/20 participants were classified as learners.  
485 However, only 2/20 reported imitating the reinforcement signal. These results suggest that the  
486 benefit of an informative reward signal does not come from allowing for explicit imitation, but  
487 rather serves as an implicit guide to achieve success. One possibility is that participants are  
488 implicitly imitating the reward signal, without being consciously aware. This is similar to the  
489 concept of phonetic convergence or accommodation, where speakers adjust their own  
490 productions to align with speech that they hear even over very short time scales (e.g., Babel,  
491 2010; Fowler et al., 2003; Goldinger, 1998; Pardo, 2006, 2013; Pickering & Garrod, 2013).  
492 Alternatively, the resynthesized speech reward signal may give participants implicit information  
493 about the dimension along which speech must be altered to achieve success, which may be  
494 important for reinforcement learning in high-dimensional motor systems (Manley et al., 2014).  
495 These results suggest that providing informative feedback may help reinforcement learning  
496 without the need to instruct participants to explicitly imitate the feedback. This finding has

497 important clinical implications, as explicit instruction about how to change motor behaviors may  
498 reduce the retention of learning after training generally (Green & Flowers, 1991; Hasson et al.,  
499 2015; Shea et al., 2001; Winstein & Schmidt, 1990), and in some neurological disorders (Boyd  
500 & Winstein, 2004, 2006; Masters et al., 2004). Interestingly, the resynthesized speech feedback  
501 condition is somewhat similar to the “reformulations” of infant speech typically made by  
502 caregivers, where they repeat the word they perceive the infant to have intended with a more  
503 adult-like pronunciation (Howard & Messum, 2011). The current results showing that feedback  
504 with implicit production targets increase learning suggests that such reformulations may in fact  
505 facilitate infant speech learning even in the absence of any attempts to imitate or match adult-like  
506 speech (c.f. Guenther, 2016)

507         Contrary to our second hypothesis, we found no evidence that masking auditory feedback  
508 of participants’ speech affected either the magnitude or the probability of learning. This is  
509 contrary to previously demonstrated results in reaching. In these tasks, participants are presented  
510 with a visual target, and must learn to alter the angle or location of their reach away from the  
511 target to receive reward. Providing visual feedback about the position of the hand in these task  
512 seems to bias the system to weight sensory errors over reinforcement feedback, such that the  
513 effect of reinforcement on learning is eliminated (Cashaback et al., 2017). Here, we found no  
514 such effect for speech when auditory feedback is available. This may result from an important  
515 difference in how speech and reaching targets are defined. Targets in laboratory reaching tasks  
516 are externally defined (e.g., move your hand to the circle on the screen). However, movement  
517 targets in speech are defined internally by each participant. Thus, when participants change their  
518 F1 in response to reinforcement feedback, they may be simultaneously altering the intended  
519 target of their speech, eliminating any potential conflict between the sensory and reinforcement

520 learning systems. As stated above, speech targets are relatively flexible even at short time scales,  
521 which provides some support for this idea. More broadly, these results suggest that the  
522 interaction between sensory error-based learning and reinforcement learning is complex and  
523 potentially reliant on whether movement targets are defined externally in the environment or  
524 internally.

525 Our data suggest that the primary factor driving learning is the magnitude of the change  
526 in F1 after trials that receive positive reward during the training phase. Participants who change  
527 F1 less after positive reward learn more, suggesting they are more capable of “exploiting” the  
528 correct behavior to receive reward. There was also a significant, but small, relationship between  
529 learning and the magnitude of F1 change after negative reward such that participants who have a  
530 greater change in F1 after negative reward learn more. This is consistent with the idea that  
531 reinforcement learning is accomplished through an exploration of the solution space. However,  
532 this seems to play a minor role in learning in these experiments. Somewhat surprisingly, learning  
533 was not related to production variability in the baseline phase or to the change in variability from  
534 the baseline to the hold phase. It may have been expected that participants who were more  
535 variable were more likely to receive positive reward and thus, to learn more readily (Dhawale et  
536 al., 2017) or that higher variability in the dimension of control that must be changed would itself  
537 facilitate learning (Wu et al., 2014); however, this seems to not be the case here. The lack of an  
538 effect between learning and variability has also been reported for some reaching tasks  
539 (Cashaback et al., 2017).

540 Lastly, we found that the changes in F1 caused by reinforcement learning were  
541 maintained through the washout phase, up to 150 trials after reinforcement was removed. This is  
542 substantially longer than changes in formant values caused by sensorimotor adaptation are

543 retained; in this case, speakers return to producing formant values near to their baseline within 30  
544 trials. This has at least two important implications. First, from a theoretical side, it suggest that  
545 reinforcement learning caused participants to shift their production goals to the target region.  
546 Without anything to push them back to their pre-training targets, they maintained these goals  
547 after reinforcement was removed. Second, from a clinical view, this suggest that reinforcement  
548 learning has the potential to cause long-lasting changes in speech production, potentially even  
549 after a relatively short training session. This suggest reinforcement learning is a likely powerful  
550 clinical tool for speech rehabilitation, consistent with previous suggestions in limb control  
551 (Roemmich & Bastian, 2018).

552 In sum, our results suggest that reinforcement learning is an active process in speech  
553 motor control and that it can cause changes in behavior even in the absence of explicit  
554 instruction. Reinforcement learning is not affected by the availability of auditory feedback and is  
555 retained after reinforcement is removed. Together, this suggests that reinforcement operates by  
556 causing a shift in the intended movement target. Notably, this shift is at least largely implicit, as  
557 few participants reported using any explicit strategies related to changing vowel quality. These  
558 results suggest altering behavior through reinforcement is possible even in complex, high-  
559 dimensional motor tasks such as speech production. These results suggest reinforcement is a  
560 plausible mechanism for early speech development, consistent with recent computation models  
561 (Howard & Messum, 2011; Messum & Howard, 2012; Warlaumont, 2014; Warlaumont et al.,  
562 2013; Warlaumont & Finnegan, 2016). Moreover, they suggest reinforcement may be a powerful  
563 clinical tool for speech rehabilitation, even without explicit instruction or detailed “knowledge of  
564 performance/results” feedback provided about errors. However, potential differences between  
565 speech and other motor domains, such as the effects of sensory masking, suggest reinforcement

566 learning should be further studied to maximize its effectiveness in rehabilitative paradigms.

567

568

569 **References**

570 Adams, S., & Page, A. (2000). Effects of Selected Practice and Feedback Variables on Speech

571 Motor Learning. *Journal of Medical Speech-Language Pathology*, 8(4), 215–220.

572 Adams, S., Page, A., & Jog, M. (2002). Summary Feedback Schedules and Speech Motor

573 Learning in Parkinson’s Disease. *Journal of Medical Speech-Language Pathology*, 10(4),

574 215–220.

575 Babel, M. (2010). Dialect divergence and convergence in New Zealand English. *Lang. Soc.*,

576 39(04), 437–456. <https://doi.org/10.1017/s0047404510000400>

577 Ballard, K. J., Granier, J. P., & Robin, D. A. (2000). Understanding the nature of apraxia of

578 speech: Theory, analysis, and treatment. *Aphasiology*, 14(10), 969–995.

579 <https://doi.org/10.1080/02687030050156575>

580 Bates, D., Maechler, M., Bolker, B., & Walker, S. (2014). lme4: Linear mixed-effects models

581 using Eigen and S4. *R Package Version*, 1.1-12(7).

582 Bislick, L. P., Weir, P. C., & Spencer, K. A. (2013). Investigation of Feedback Schedules on

583 Speech Motor Learning in Individuals with Apraxia of Speech. *Journal of Medical*

584 *Speech· Language Pathology*, 20(4), 18–23.

585 Bislick, L. P., Weir, P. C., Spencer, K., Kendall, D., & Yorkston, K. M. (2012). Do principles of

586 motor learning enhance retention and transfer of speech skills? A systematic review.

587 *Aphasiology*, 26(5), 709–728. <https://doi.org/10.1080/02687038.2012.676888>

588 Boersma, P., & Weenink, D. (2019). *Praat: Doing phonetics by computer*. (Version 6.0.47)

- 589 [Computer software]. <http://www.praat.org/>
- 590 Boyd, L. A., & Winstein, C. J. (2004). Providing explicit information disrupts implicit motor  
591 learning after basal ganglia stroke. *Learn Mem*, *11*(4), 388–396.  
592 <https://doi.org/10.1101/lm.80104>
- 593 Boyd, L. A., & Winstein, C. J. (2006). Explicit Information Interferes with Implicit Motor  
594 Learning of Both Continuous and Discrete Movement Tasks After Stroke. *Journal of*  
595 *Neurologic Physical Therapy*, *30*(2), 46–57.  
596 <https://doi.org/10.1097/01.NPT.0000282566.48050.9b>
- 597 Cai, S., Boucek, M., Ghosh, S., Guenther, F. H., & Perkell, J. (2008). A System for Online  
598 Dynamic Perturbation of Formant Trajectories and Results from Perturbations of the  
599 Mandarin Triphthong /iau/. *Proceedings of the 8th International Seminar on Speech*  
600 *Production*, 65–68.
- 601 Cashaback, J. G. A., McGregor, H. R., Mohatarem, A., & Gribble, P. L. (2017). Dissociating  
602 error-based and reinforcement-based loss functions during sensorimotor learning. *PLoS*  
603 *Comput Biol*, *13*(7), e1005623. <https://doi.org/10.1371/journal.pcbi.1005623>
- 604 Daliri, A., & Dittman, J. (2019). Successful auditory motor adaptation requires task-relevant  
605 auditory errors. *Journal of Neurophysiology*, *122*(2), 552–562.  
606 <https://doi.org/10.1152/jn.00662.2018>
- 607 Dhawale, A. K., Smith, M. A., & Ölveczky, B. P. (2017). The Role of Variability in Motor  
608 Learning. *Annu Rev Neurosci*, *40*, 479–498. [https://doi.org/10.1146/annurev-neuro-](https://doi.org/10.1146/annurev-neuro-072116-031548)  
609 [072116-031548](https://doi.org/10.1146/annurev-neuro-072116-031548)
- 610 Duffy, J. R. (2013). *Motor speech disorders: Substrates, differential diagnosis, and management*  
611 (Third edition). Elsevier.



- 612 Fowler, C. A., Brown, J. M., Sabadini, L., & Weihing, J. (2003). Rapid access to speech gestures  
613 in perception: Evidence from choice and simple response time tasks. *Journal of Memory*  
614 *and Language*, 49(3), 396–413.
- 615 Galea, J. M., Mallia, E., Rothwell, J., & Diedrichsen, J. (2015). The dissociable effects of  
616 punishment and reward on motor learning. *Nat Neurosci*, 18(4), 597–602.  
617 <https://doi.org/10.1038/nn.3956>
- 618 Goldinger, S. D. (1998). Echoes of echoes? An episodic theory of lexical access. *Psychological*  
619 *Review*, 105(2), 251–279.
- 620 Green, T. D., & Flowers, J. H. (1991). Implicit versus Explicit Learning Processes in a  
621 Probabilistic, Continuous Fine-Motor Catching Task. *Journal of Motor Behavior*, 23(4),  
622 293–300. <https://doi.org/10.1080/00222895.1991.9942040>
- 623 Guenther, F. H. (2016). *Neural control of speech*. The MIT Press.
- 624 Hasson, C. J., Manczurovsky, J., & Yen, S.-C. (2015). A reinforcement learning approach to  
625 gait training improves retention. *Frontiers in Human Neuroscience*, 9.  
626 <https://doi.org/10.3389/fnhum.2015.00459>
- 627 Houde, J. F., & Jordan, I. M. (1998). Sensorimotor adaptation in speech production. *Science*,  
628 279, 1213–1216.
- 629 Howard, I. S., & Messum, P. (2011). Modeling the development of pronunciation in infant  
630 speech acquisition. *Motor Control*, 15(1), 85–117.
- 631 Howard, I. S., & Messum, P. (2014). Learning to pronounce first words in three languages: An  
632 investigation of caregiver and infant behavior using a computational model of an infant.  
633 *PLoS One*, 9(10), e110334. <https://doi.org/10.1371/journal.pone.0110334>
- 634 Hula, S. N. A., Robin, D. A., Maas, E., Ballard, K. J., & Schmidt, R. A. (2008). Effects of

635 feedback frequency and timing on acquisition, retention, and transfer of speech skills in  
636 acquired apraxia of speech. *Journal of Speech, Language & Hearing Research*, 51(5),  
637 1088–1113.

638 Izawa, J., & Shadmehr, R. (2011). Learning from sensory and reward prediction errors during  
639 motor adaptation. *PLOS Computational Biology*, 7(3), e1002012.  
640 <https://doi.org/10.1371/journal.pcbi.1002012>

641 Katz, W. F., McNeil, M. R., & Garst, D. M. (2010). Treating apraxia of speech (AOS) with  
642 EMA-supplied visual augmented feedback. *Aphasiology*, 24(6–8), 826–837.  
643 <https://doi.org/10.1080/02687030903518176>

644 Kooij, K. van der, & Overvliet, K. E. (2016). Rewarding imperfect motor performance reduces  
645 adaptive changes. *Experimental Brain Research*, 234(6), 1441–1450.  
646 <https://doi.org/10.1007/s00221-015-4540-1>

647 Krakauer, J. W. (2015). The applicability of motor learning to neurorehabilitation. In V. Dietz &  
648 N. Ward (Eds.), *Oxford Textbook of Neurorehabilitation* (pp. 55–64). Oxford University  
649 Press. <https://doi.org/10.1093/med/9780199673711.003.0007>

650 Kuznetsova, A., Brockhoff, P. B., & Christensen, R. H. B. (2017). lmerTest Package: Tests in  
651 Linear Mixed Effects Models. *Journal of Statistical Software*, 82(13).  
652 <https://doi.org/10.18637/jss.v082.i13>

653 Lametti, D. R., Nasir, S. M., & Ostry, D. J. (2012). Sensory preference in speech production  
654 revealed by simultaneous alteration of auditory and somatosensory feedback. *Journal of*  
655 *Neuroscience*, 32(27), 9351–9358. <https://doi.org/10.1523/JNEUROSCI.0404-12.2012>

656 Lametti, D. R., Smith, H. J., Watkins, K. E., & Shiller, D. M. (2018). Robust Sensorimotor  
657 Learning during Variable Sentence-Level Speech. *Current Biology*, 28(19), 3106-

- 658 3113.e2. <https://doi.org/10.1016/j.cub.2018.07.030>
- 659 Lenth, R., Singmann, H., Love, J., Buerkner, P., & Herve, M. (2020). *emmeans: Estimated*  
660 *Marginal Means, aka Least-Squares Means*.
- 661 MacDonald, E. N., Purcell, D. W., & Munhall, K. G. (2011). Probing the independence of  
662 formant control using altered auditory feedback. *J Acoust Soc Am*, *129*(2), 955–965.  
663 <https://doi.org/10.1121/1.3531932>
- 664 Manley, H., Dayan, P., & Diedrichsen, J. (2014). When money is not enough: Awareness,  
665 success, and variability in motor learning. *PLoS One*, *9*(1), e86580.  
666 <https://doi.org/10.1371/journal.pone.0086580>
- 667 Masters, R. S. W., MacMahon, K. M. A., & Pall, H. S. (2004). Implicit Motor Learning in  
668 Parkinson’s Disease. *Rehabilitation Psychology*, *49*(1), 79–82.  
669 <https://doi.org/10.1037/0090-5550.49.1.79>
- 670 Messum, P., & Howard, I. S. (2012). Speech development: Toddlers don’t mind getting it wrong.  
671 *Curr Biol*, *22*(5), R160-1. <https://doi.org/10.1016/j.cub.2012.01.032>
- 672 Mitsuya, T., MacDonald, E. N., Munhall, K. G., & Purcell, D. W. (2015). Formant compensation  
673 for auditory feedback with English vowels. *The Journal of the Acoustical Society of*  
674 *America*, *138*(1), 413–424.
- 675 Nikooyan, A. A., & Ahmed, A. A. (2015). Reward feedback accelerates motor learning. *J*  
676 *Neurophysiol*, *113*(2), 633–646. <https://doi.org/10.1152/jn.00032.2014>
- 677 Pardo, J. S. (2006). On phonetic convergence during conversational interaction. *J Acoust Soc*  
678 *Am*, *119*(4), 2382–2393.
- 679 Pardo, J. S. (2013). Measuring phonetic convergence in speech production. *Front Psychol*, *4*,  
680 559. <https://doi.org/10.3389/fpsyg.2013.00559>

- 681 Parrell, B., Agnew, Z., Nagarajan, S., Houde, J. F., & Ivry, R. B. (2017). Impaired Feedforward  
682 Control and Enhanced Feedback Control of Speech in Patients with Cerebellar  
683 Degeneration. *Journal of Neuroscience*, *37*(38), 9249–9258.  
684 <https://doi.org/10.1523/JNEUROSCI.3363-16.2017>
- 685 Pickering, M. J., & Garrod, S. (2013). An integrated theory of language production and  
686 comprehension. *Behav Brain Sci*, *36*(4), 329–347.  
687 <https://doi.org/10.1017/S0140525X12001495>
- 688 Purcell, D. W., & Munhall, K. G. (2006). Adaptive control of vowel formant frequency:  
689 Evidence from real-time formant manipulation. *Journal of Acoustical Society of America*,  
690 *120*(2), 966–977.
- 691 R Core Team. (2013). *R: A Language and Environment for Statistical Computing*. R Foundation  
692 for Statistical Computing. <http://www.R-project.org/>
- 693 Roemmich, R. T., & Bastian, A. J. (2018). Closing the Loop: From Motor Neuroscience to  
694 Neurorehabilitation. *Annual Review of Neuroscience*, *41*(1), 415–429.  
695 <https://doi.org/10.1146/annurev-neuro-080317-062245>
- 696 Schmidt, R. A., & Lee, T. D. (2011). *Motor control and learning: A behavioral emphasis* (5th  
697 ed). Human Kinetics.
- 698 Shea, C. H., Wulf, G., Whitacre, C. A., & Park, J. H. (2001). Surfing the implicit wave. *The*  
699 *Quarterly Journal of Experimental Psychology Section A*, *54*(3), 841–862.  
700 <https://doi.org/10.1080/713755993>
- 701 Shiller, D. M., Sato, M., Gracco, V. L., & Baum, S. R. (2009). Perceptual recalibration of speech  
702 sounds following speech motor learning. *Journal of Acoustical Society of America*,  
703 *125*(2), 1103–1113. <https://doi.org/10.1121/1.3058638>

- 704 Steinhauer, K., & Grayhack, J. P. (2000). The role of knowledge of results in performance and  
705 learning of a voice motor task. *Journal of Voice*, *14*(2), 137–145.  
706 [https://doi.org/10.1016/S0892-1997\(00\)80020-X](https://doi.org/10.1016/S0892-1997(00)80020-X)
- 707 Therrien, A. S., Wolpert, D. M., & Bastian, A. J. (2016). Effective reinforcement learning  
708 following cerebellar damage requires a balance between exploration and motor noise.  
709 *Brain*. <https://doi.org/10.1093/brain/awv329>
- 710 Tourville, J. A., Cai, S., & Guenther, F. (2013). Exploring auditory-motor interactions in normal  
711 and disordered speech. *Proceedings of Meetings on Acoustics*, *19*, 060180.  
712 <https://doi.org/10.1121/1.4800684>
- 713 Villacorta, V. M., Perkell, J. S., & Guenther, F. H. (2007). Sensorimotor adaptation to feedback  
714 perturbations of vowel acoustics and its relation to perception. *Journal of Acoustical*  
715 *Society of America*, *122*(4), 2306–2319. <https://doi.org/10.1121/1.2773966>
- 716 Warlaumont, A. S. (2014). Reinforcement-modulated self-organizaition in infant motor speech  
717 learning. In J. Mayor & P. Gomez (Eds.), *Computational Models of Cognitive Processes*  
718 (pp. 112–124). World Scientific.
- 719 Warlaumont, A. S., & Finnegan, M. K. (2016). Learning to Produce Syllabic Speech Sounds via  
720 Reward-Modulated Neural Plasticity. *PLoS One*, *11*(1), e0145096.  
721 <https://doi.org/10.1371/journal.pone.0145096>
- 722 Warlaumont, A. S., Westermann, G., Buder, E. H., & Oller, D. K. (2013). Prespeech motor  
723 learning in a neural network using reinforcement. *Neural Netw*, *38*, 64–75.  
724 <https://doi.org/10.1016/j.neunet.2012.11.012>
- 725 Winstein, C. J., & Schmidt, R. A. (1990). Reduced frequency of knowledge of results enhances  
726 motor skill learning. *Journal of Experimental Psychology: Learning, Memory, and*

727 *Cognition*, 16(4), 677–691. <https://doi.org/10.1037/0278-7393.16.4.677>

728 Wong, A. L., & Shelhamer, M. (2011). Exploring the Fundamental Dynamics of Error-Based  
 729 Motor Learning Using a Stationary Predictive-Saccade Task. *PLoS ONE*, 6(9), e25225.  
 730 <https://doi.org/10.1371/journal.pone.0025225>

731 Wu, H. G., Miyamoto, Y. R., Gonzalez Castro, L. N., Ölveczky, B. P., & Smith, M. A. (2014).  
 732 Temporal structure of motor variability is dynamically regulated and predicts motor  
 733 learning ability. *Nat Neurosci*, 17(2), 312–321. <https://doi.org/10.1038/nn.3616>

734

735

736 **Appendix**

737 Participant responses to post-experiment survey about strategy use.

| Exp   | Used a strategy | Strategy related to changing vowel quality | Imitated feedback | Strategy                                                                                                                                                                                                                                                                                                                                                                                                                                                                                                                                 |
|-------|-----------------|--------------------------------------------|-------------------|------------------------------------------------------------------------------------------------------------------------------------------------------------------------------------------------------------------------------------------------------------------------------------------------------------------------------------------------------------------------------------------------------------------------------------------------------------------------------------------------------------------------------------------|
| Exp 2 | ✓               |                                            | ✓                 | listening to correct words said by the computer and trying to mimic them                                                                                                                                                                                                                                                                                                                                                                                                                                                                 |
|       | ✓               |                                            | ✓                 | If I got a word correct, I tried to copy the way the playback of myself said the word                                                                                                                                                                                                                                                                                                                                                                                                                                                    |
|       | ✓               | ✓                                          |                   | Yes. For "bed," I tried to make more of a schwa sound, therefore rounding my lips more than usual and keeping my mouth more closed. Usually, when I say "bed," I open my mouth wider. For the words "head" and "dead," I tried to not let my pitch go up and tried to keep my pitch level throughout the vowel sound. Again, I tried to keep my mouth more closed than usual and tried to keep the vowel sound consistent. If I said the words with a more open mouth like I usually do, the computer registered them as "had" or "dad." |
|       |                 |                                            |                   | not really i just tried to not say the four letter words too fast                                                                                                                                                                                                                                                                                                                                                                                                                                                                        |
|       | ✓               |                                            |                   | At times I would look at my reflection and read the word while looking at my reflection to keep myself entertained and from dozing off. Another strategy I used was counting on my fingers to see how many words I would say.                                                                                                                                                                                                                                                                                                            |
|       |                 |                                            |                   | I did not                                                                                                                                                                                                                                                                                                                                                                                                                                                                                                                                |
|       | ✓               |                                            |                   | I tried to be as articulate as possible when I said the words                                                                                                                                                                                                                                                                                                                                                                                                                                                                            |
|       | ✓               | ✓                                          |                   | To adjust my pronunciation.                                                                                                                                                                                                                                                                                                                                                                                                                                                                                                              |
|       | ✓               |                                            |                   | I realized that the d on each of the words was short.                                                                                                                                                                                                                                                                                                                                                                                                                                                                                    |
|       | ✓               |                                            |                   | I tried to pronounce the words very clearly                                                                                                                                                                                                                                                                                                                                                                                                                                                                                              |

|              |   |   |     |                                                                                                                                                                                                                      |
|--------------|---|---|-----|----------------------------------------------------------------------------------------------------------------------------------------------------------------------------------------------------------------------|
|              | ✓ | ✓ |     | Yes. If I got the word wrong and had points deducted then I tried to change how I pronounced the word a little bit. I usually tried focusing on the middle part of the word and changed how I pronounced that.       |
|              | ✓ |   |     | Speaking more clearly by focusing on one word at a time                                                                                                                                                              |
|              | ✓ |   |     | The words dead and head were similar to say, found if you kept A silent it gave you the points                                                                                                                       |
|              | ✓ |   |     | I TRIED TO PRONOUNCE THE WORDS WITH A STEADY TONE AND EMPHASIS ON THE LAST PHONEME WHICH GOT ME POINTS AND THEN FOR THE RETRAIN SECTION I TRIED TO CHANGE THE WAY I PRONOUNCED THEM TO MATCH UP WITH THE SECOND TASK |
|              | ✓ |   |     | yes for head i looked at the e so i remembered to pronounce it correctly.                                                                                                                                            |
|              |   |   |     | No, I did not                                                                                                                                                                                                        |
|              | ✓ |   |     | to fully stretch out my e's                                                                                                                                                                                          |
|              |   |   |     | not really-i thought that emphasizing certain parts of the word helped at times.                                                                                                                                     |
|              | ✓ | ✓ |     | CHANGING THE WAY I PRONOUNCED WORDS IN ORDER TO GET POINTS                                                                                                                                                           |
|              | ✓ |   |     | During the testing phase, if I spoke lower I was more likely to get the answer right and get the points.                                                                                                             |
| <b>Exp 3</b> | ✓ |   | n/a | I tried to keep my voice low and pronounce each word                                                                                                                                                                 |
|              |   |   | n/a | no.                                                                                                                                                                                                                  |
|              | ✓ |   | n/a | I tried to read the words very clearly and with diction.                                                                                                                                                             |
|              | ✓ |   | n/a | i noticed when i articulated the /d/ at the end of the sentence i gained points                                                                                                                                      |
|              |   |   | n/a | No                                                                                                                                                                                                                   |
|              | ✓ |   | n/a | i tried to say the word not like how the person thought i was saying it on the screen                                                                                                                                |
|              | ✓ |   | n/a | If I got one right where the computer gave me 10 points (rare) I would try to not move at all and hope the next word was the same or similar in order to get another one right.                                      |
|              | ✓ | ✓ | n/a | I tried to do a 'short e' sound as much as possible, as my words kept getting confused with 'a' sounds. I tried to change my sound so that the computer would recognize it, without it seeming forced.               |
|              | ✓ |   | n/a | yes, when I got a word correct I tried to repeat the next word in the exact same way by positioning/moving my mouth the same way                                                                                     |
|              | ✓ |   | n/a | Yes- I repeated words a certain way once I finally noticed how I was expected to say them to earn points.                                                                                                            |
|              | ✓ |   | n/a | I tried to announce my E's more                                                                                                                                                                                      |
|              |   |   | n/a | No, just kept going for it                                                                                                                                                                                           |
|              | ✓ |   | n/a | I started to stress the vowels making them longer in order for the machine to approve them                                                                                                                           |
|              | ✓ |   | n/a | I noticed that the computer thought I used "ad" endings a lot more than I did so I would try and pronounce the "e" sounds more in words that this occurred. This did not always work.                                |
|              | ✓ |   | n/a | How to speak clearly so words are apparent                                                                                                                                                                           |

|  |   |   |     |                                                                                                                                                                                                                                                                                                                                                                                                                                                                                                                                                                                                                                                                                                                                                                                                                                                                                                     |
|--|---|---|-----|-----------------------------------------------------------------------------------------------------------------------------------------------------------------------------------------------------------------------------------------------------------------------------------------------------------------------------------------------------------------------------------------------------------------------------------------------------------------------------------------------------------------------------------------------------------------------------------------------------------------------------------------------------------------------------------------------------------------------------------------------------------------------------------------------------------------------------------------------------------------------------------------------------|
|  | ✓ |   | n/a | For words with an "e" sound like "bed" or "dead" or "head" I had to prolong the "e" sound for the computer to understand. For too short of a word it would think I said an "a" sound like "bad" or "dad" or "had". I could tell if I was saying the word long enough by listening to the static in the headphones. It needed to be a certain length of static before I knew I should end the word with the next consonant. Also, I wasn't staring at the screen. I knew the next word was up when the static started to play in the headphones, and then I read it from the screen. When I was originally staring at the screen I could predict what word was coming next, or at least my brain was trying to, and then I felt like I had a harder time saying the next word because I already thought I knew what the word should be. So I stopped looking and only looked up when I heard static. |
|  | ✓ | ✓ | n/a | I'm not sure, but maybe pronouncing words slightly different to see if changes would make the word correct. If it was correct, then using that change when the same word came up again.                                                                                                                                                                                                                                                                                                                                                                                                                                                                                                                                                                                                                                                                                                             |
|  | ✓ |   | n/a | I pronounced "head" with less emphasis on the "ea" part.                                                                                                                                                                                                                                                                                                                                                                                                                                                                                                                                                                                                                                                                                                                                                                                                                                            |
|  | ✓ |   | n/a | I tried to enunciate my vowels                                                                                                                                                                                                                                                                                                                                                                                                                                                                                                                                                                                                                                                                                                                                                                                                                                                                      |
|  | ✓ |   | n/a | I started to say the words head, bed, dead quicker                                                                                                                                                                                                                                                                                                                                                                                                                                                                                                                                                                                                                                                                                                                                                                                                                                                  |
|  | ✓ |   | n/a | I contorted my mouth and diaphragm in ways I did not think possible in order to enunciate the words. My main strategy was to try and hit the first syllable as hard as possible.                                                                                                                                                                                                                                                                                                                                                                                                                                                                                                                                                                                                                                                                                                                    |
